# Supplementary material for: Knockdown of Antisense Noncoding Mitochondrial RNA Reduces Tumorigenicity of Patient-Derived Clear Cell Renal Carcinoma Cells in an Orthotopic Xenograft Mouse Model
Source: Preprints.org preprint supplement (doi:10.20944/preprints202401.0225.v1), 2024-01-03
Supplement: Supplementary file 1 [file supplementary]

**Figure S1**

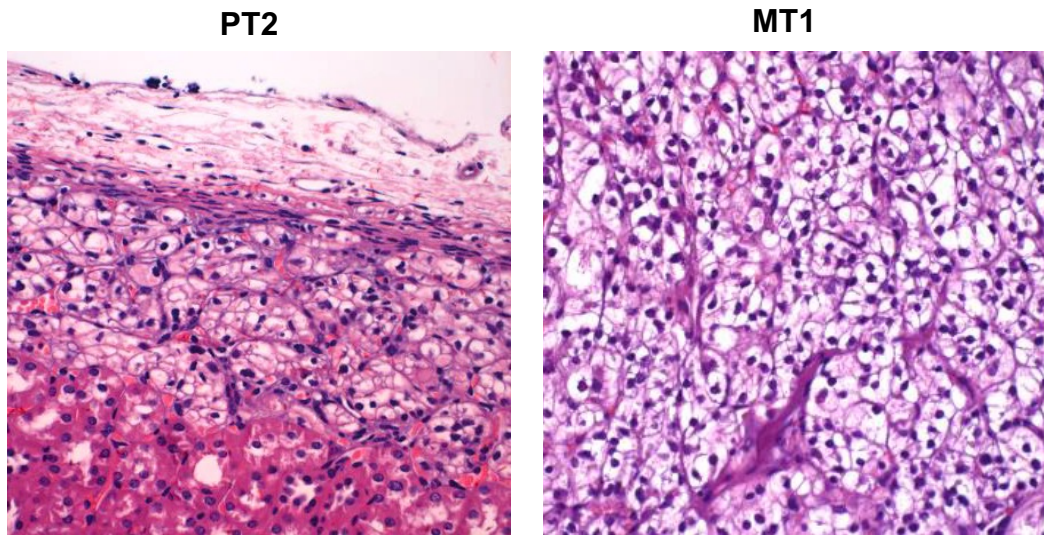

**Figure S1.** H&E-stained sections of subcapsular patient-derived ccRCC tumors in NOD-SCID mice, at 6 weeks post-inoculation. Left, PT2; Right, MT1. Both tumors display the clear cytoplasm characteristic of ccRCC. 40X magnification.
